# Supplementary material for: Synthesis and shape memory property of segmented poly(ester urethane) with poly(butylene 1,4-cyclohexanedicarboxylate) as the soft segment
Source: Royal Society of Chemistry journal article supplement (doi:10.1039/c6ra16325d), 2016-01-01
Supplement: c6ra16325d1.pdf [file c6ra16325d1.pdf]

## Supporting Information

### Cyclic Tensile Experiment

The cyclic tensile test is carried out at room temperature in an Instron 5567 instrument. The sample is prepared following Chinese standard GB/T1040.1-2006. The tensile curves and the detailed recoverability are listed in Figure S1 and Table S1 respectively.

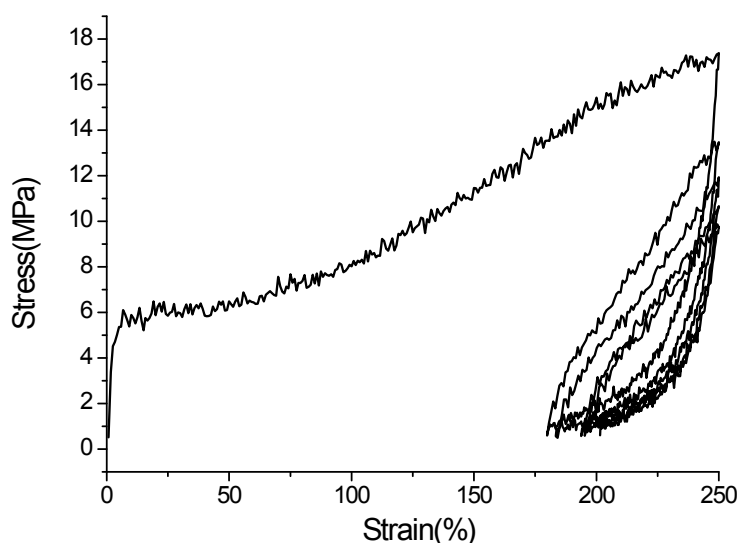

**Figure S1.** The cyclic tensile testing process of 250% strain for 5cycles of PU1700. Cyclic tensile testing was examined by stretching samples in a cyclic way with a maximum deformation of 250%. Dumbbell-shaped splines of 35 mm length, 2 mm width and ~0.5 mm thickness were stretched at a rate of 100 mm/min and returned at a rate of 50 mm/min for five cycles.

**Table S1.** The recovery rate of PU1700 in the cyclic tensile testing process.

| $R_1(\%)$ | $R_2(\%)$ | $R_3(\%)$ | $R_4(\%)$ | $R_5(\%)$ |
|-----------|-----------|-----------|-----------|-----------|
| 26±2      | 85±5      | 86±3      | 92±2      | 90±5      |
